1 **Title: Patterns of early neocortical amyloid beta accumulation: a positron emis-**  
2 **sion tomography population-based study**

3 Emily E. Leczy<sup>1,2</sup>, Hoon-Ki Min<sup>1</sup>, Christopher J. Apgar<sup>1,2</sup>, Daniela D. Maltais<sup>1</sup>, Emily S.  
4 Lundt<sup>3</sup>, Sabrina M. Albertson<sup>3</sup>, Matthew L. Senjem<sup>4</sup>, Christopher G. Schwarz<sup>1</sup>, Hugo Bo-  
5 tha<sup>5</sup>, Jonathan Graff-Radford<sup>5</sup>, David T. Jones<sup>5</sup>, Prashanthi Vemuri<sup>1</sup>, Kejal Kantarci<sup>1</sup>,  
6 David S. Knopman<sup>5</sup>, Ronald C. Petersen<sup>5</sup>, Clifford R. Jack Jr<sup>1</sup>, Jeyeon Lee<sup>1\*</sup> and Val J.  
7 Lowe<sup>1\*</sup>

8  
9 <sup>1</sup> Department of Radiology, Mayo Clinic, Rochester, Minnesota, USA

10 <sup>2</sup> Department of Neuroscience, University of Minnesota, Minneapolis, Minnesota, USA

11 <sup>3</sup> Division of Biostatistics, Department of Health Sciences Research, Mayo Clinic, Roch-  
12 ester, Minnesota, USA

13 <sup>4</sup> Department of Technology, Mayo Clinic, Rochester, Minnesota, USA

14 <sup>5</sup> Department of Neurology, Mayo Clinic, Rochester, Minnesota, USA

15  
16 **Correspondences**

17 Val J. Lowe, Department of Radiology, Mayo Clinic, MN, 55905, USA

18 Email: [vlowe@mayo.edu](mailto:vlowe@mayo.edu)

19 Jeyeon Lee, Department of Radiology, Mayo Clinic, MN, 55905, USA

20 Email: [lee.jeyeon@mayo.edu](mailto:lee.jeyeon@mayo.edu)

21

22

23

24 **Research in context**

25 1. Systematic review: Authors reviewed current literature using PubMed and Google

26 Scholar. These searches found several articles linked to the topographical deposition of

27 A $\beta$  and PiB-PET imaging of the brain in various states- cognitively unimpaired to those

28 with Alzheimer's disease.

29 2. Interpretation: Regions of deposition stated within mirror some findings of past stud-

30 ies analyzing early deposition patterns and also reside in areas with high functional and

31 structural connectivity, supporting the theory that amyloid deposits in these high traffic

32 areas.

33 3. Future Directions: This article serves as an important step to generalizing findings

34 about amyloid load as our population-based study provides generalizable data. Future

35 reports should aim to further understand these patterns using longitudinal data from AD

36 patients, to confirm early deposition patterns more confidently for those with AD.

37 **Abstract**

38 **Introduction:** The widespread deposition of amyloid beta ( $A\beta$ ) plaques in late-stage  
39 Alzheimer's disease (AD) is well defined and confirmed by *in vivo* positron emission to-  
40 mography (PET). However, there are discrepancies between which regions contribute  
41 to the earliest topographical  $A\beta$  deposition within the neocortex.

42 **Methods:** This study investigated  $A\beta$  signals in the peri-threshold SUVR range using  
43 Pittsburgh compound B (PiB) PET in a population-based study cross-sectionally and  
44 longitudinally. PiB-PET scans from 1,088 participants were assessed to determine the  
45 early patterns of PiB loading in the neocortex.

46 **Results:** Early-stage  $A\beta$  loading is seen first in the temporal, cingulate, and occipital re-  
47 gions. Regional early deposition patterns are similar in both Apolipoprotein  $\epsilon 4$  (APOE)  
48 carriers and non-carriers. Hierarchical clustering analysis shows groups with different  
49 patterns of early amyloid deposition.

50 **Discussion:** These finding of initial  $A\beta$  deposition patterns may be of significance for  
51 diagnostics and understanding the development of different AD phenotypes.

52

53 **Keywords:** Amyloid beta, Pittsburgh compound B (PiB), positron emission tomography  
54 (PET), early stage

## 55 1. INTRODUCTION

56 The neuropathology of Alzheimer's disease (AD) is characterized by the deposi-  
57 tion of Amyloid beta plaques (A $\beta$ ). [1, 2] Positron emission tomography (PET) using A $\beta$   
58 tracers has added to our understanding of A $\beta$  deposition and AD progression. The first  
59 A $\beta$  radiotracer, Pittsburgh Compound B (PiB), has been used in AD studies for more  
60 than a decade [3] and aligns with histological findings of A $\beta$  localization. [4] Other A $\beta$   
61 PET biomarkers are currently available [5] and have been shown to have diagnostic ac-  
62 curacy similar to that of PiB, further establishing its efficacy. [6, 7] Currently, the wide-  
63 spread aggregation of A $\beta$  plaques in late stage AD is well established; [8, 9] however,  
64 there are discrepancies across studies in how and where A $\beta$  deposition begins. [10, 11]

65 Neuropathological studies describe the progression of A $\beta$  deposition in ordered  
66 stages termed "Thal phases" in which deposition occurs in five phases. [12] The first  
67 Thal phase of isocortical A $\beta$  deposition is defined as occurring exclusively in the  
68 neocortex, with exception of the paracentral lobule. [12] This cortical A $\beta$  deposition is  
69 described as being diffusely distributed and without a specific neocortical regional pat-  
70 tern. While these postmortem histological studies provide conclusive results on the loca-  
71 tion of A $\beta$  proteins at death, [13] it remains difficult to observe A $\beta$  early progression be-  
72 cause the majority of samples are from those whose A $\beta$  onset was likely years prior and  
73 only 51 participants were evaluated. [12]

74 PET imaging studies provide a more detailed picture of neocortical deposition  
75 and longitudinal development *in vivo*. Past PET studies have analyzed different A $\beta$  radi-  
76 otracers and suggest areas where A $\beta$  deposition begins; however, these studies show  
77 some inconsistencies in which regions early A $\beta$  aggregation begins. Some describe ear-

78 ly A $\beta$  aggregation occurring in frontal areas such as frontotemporal association corti-  
79 ces,[14] frontomedial areas,[15] large-scale brain networks such as the default mode  
80 network (DMN),[16] parietal regions such as the precuneus,[15, 17] cingulate,[17] and  
81 medial orbitofrontal areas.[15, 17] There are discrepancies in the descriptions the tem-  
82 poral lobe in initial accumulation as some publications claim this to be a later aggrega-  
83 tion point[15] while others deem it an early accumulation site.[14] Unfortunately, most of  
84 these studies have limitations by using pre-selected cohorts that limit the ability to gen-  
85 eralize their results to the general population. Some do not assess the effect of risks  
86 factors on A $\beta$  aggregation patterns, such as Apolipoprotein  $\epsilon$ 4 (APOE) status or familial  
87 history.[18] These inconsistencies in study design and conclusions of early aggregation  
88 of A $\beta$  demonstrate a need to revisit the earliest patterns of A $\beta$  in a population-based  
89 study.

90 In this work, PiB-PET is used in an epidemiological community-based population  
91 study to assess the prevalence of focal early A $\beta$  signal changes across varying brain  
92 regions in the neocortex both cross-sectionally and longitudinally. To see subtle differ-  
93 ences in A $\beta$  deposition we: (1) selected participants who had an amyloid signal near the  
94 global PiB cut-off point,[19] called the Early PiB group, (2) determined elevated A $\beta$  sta-  
95 tus for each ROI independently compared to younger cognitively unimpaired (CU) indi-  
96 viduals [20] and (3) analyzed the elevated PiB data by ROI-wise analysis. Patterns of  
97 early regional A $\beta$  deposition were assessed and cluster analysis was used to determine  
98 subgroups with different A $\beta$  deposition patterns within the population.

99

## 100 **2. MATERIALS AND METHODS**

## 101 2.1 Participants

102 All chosen participants were enrolled in the Mayo Clinic Study of Aging (MCSA),  
103 a population-based randomized aging study from Olmsted County Minnesota of a wide  
104 age range.[21] Participants provided written consent with approval of Mayo Clinic and  
105 Olmsted Medical Center Institutional Review Boards. MCSA participants were invited to  
106 participate in imaging studies if they did not have contraindications. At enrollment and  
107 for all subsequent visits participants were clinically diagnosed as CU, having mild cogni-  
108 tive impairment (MCI), or having dementia via a consensus conference process (Sup-  
109 plementary Table 1).[22]

110

## 111 2.2 Neuroimaging and image analysis

112 Participants undergoing PiB-PET scans received a PiB dose (range 293.8-746.3  
113 MBq), followed by a 33.5-64.5-minute post injection period. After, PET acquisition was  
114 taken for twenty minutes as previously described.[23] Cortical regions of interest (ROI)  
115 were defined by an in-house version of the automated anatomic labelling atlas[24] as  
116 previously described.[25] Standardized uptake value ratio (SUVr) image was calculated  
117 by dividing the median of uptake in the cerebellar crus grey matter. Regional SUVr up-  
118 take was defined as the median uptake across all grey matter voxels in a ROI. Two-  
119 component partial volume correction was used.[26] Global cortical PiB-PET SUVr was  
120 computed from a meta-region of interest.[19] Data may be available from the authors  
121 upon reasonable request and with permission.

122

## 123 2.3 Early PiB group and subgroups

124 To create a sample population that would be the most likely to have A $\beta$  deposi-  
125 tion, selected subjects that had amyloid signal near the global PiB cut-off point (SUVr of  
126 1.42).[19] Thus, participants of this study, deemed the “Early PiB” group, were chosen if  
127 they were 50 years of age or older (50+), and had a global SUVr between 1.29 to 1.64  
128 (Figure 1). The lower cut-off point in this range (1.29) was selected as the lower tertile  
129 global SUVr boundary of those 50+ in the MSCA who were CU. The upper limit of this  
130 range (1.64) was selected as the lower tertile boundary of the global SUVr for those 50+  
131 in the MSCA with elevated amyloid levels. The Early PiB group (n=1,088) was com-  
132 prised of 89.6% CU, 9.9% MCI, and 0.6% dementia (Supplementary Table 1).

133 The Early PiB group was then further distributed into subgroups of participants  
134 based on how many individual ROIs with elevated PiB levels were seen in each partici-  
135 pant (i.e., the more elevated ROIs, the higher the participant group assignment). The  
136 regional elevated PiB level was determined by using region-specific cut-offs as being  
137 above the 95th percentile of younger CU MCSA individuals (30-49 years, n=146).[20]  
138 Groups were then defined with equitably participant-sized subgroupings. In all, six ele-  
139 vated ROI-based subgroups were created: very-low (n=170), low (n=180), low-  
140 moderate (n=185), moderate (n=186), moderate-high (n=190), and high (n=177) (where  
141 n=1,088, the respective participant number included). (Table 1, Figure 1, histogram).

142

#### 143 2.4 SUVr based clustering analysis

144 Agglomerative hierarchical clustering analysis[27] with the Ward linkage method  
145 was performed using regional SUVr values (averaged over left and right hemispheres).  
146 We used Euclidean distance as a similarity measure. This iterative bottom-up algorithm

147 combines pairs of clusters at each step while minimizing the sum of squared errors from  
148 the cluster mean. The number of clusters was fixed to 3 ( $K=3$ ) a priori. The algorithm  
149 does not guarantee finding the optimal solution, and thus we also performed a k-means  
150 clustering analysis to compare the results.[28] Squared Euclidean distance was used as  
151 the similarity measure. The algorithm returns the  $K$  centroids maximizing intra-cluster  
152 similarity and maximizing inter-cluster dissimilarity. To compare rates of amyloid deposi-  
153 tion by cluster we computed annualized percentage changes in SUVr for each cortical  
154 regions. Analyses were performed using R Statistical Software (version 3.6.2). The 3D  
155 volume rendering illustrations were created using the Surf Ice software  
156 (<https://www.nitrc.org/projects/surface/>).

157

### 158 **3. RESULTS**

#### 159 **3.1 Cross-sectional staging of regional amyloid deposition**

160 Elevated PiB-PET determined by region-specific cutoffs was observed in over  
161 80% of Early PiB participants within the fusiform, angular gyrus, inferior and middle  
162 temporal, middle occipital, and calcarine region (Figure 2A). The amygdala and superior  
163 temporal pole had minimal elevation in PiB-PET SUVr, with elevation in under 25% of  
164 the population. The overall pattern of frequencies of amyloid-positivity was not visually  
165 different when applying the hemisphere specific-cutoff (left or right) or global hemispher-  
166 ic cutoff (voxel weighted median of left and right).

167 Estimation of a regional amyloid-beta progression by sub-grouping the partici-  
168 pants using regional frequencies of amyloid-positivity revealed unique early patterns of  
169 amyloid burden in the brain (Figure 2B and supplementary figure 1 with detailed ROI



170 data). The temporal, posterior cingulate, and occipital cortices and angular gyrus are  
171 seen to show early elevated PiB compared to other cortices in the 'very low' subgroup.  
172 Unique regional patterns appeared throughout the subgroups and eventually saturated  
173 all regions with elevated PiB-PET signal in the 'high' subgroup. Additionally, fusiform,  
174 inferior and the middle temporal region, middle temporal pole, posterior cingulate, angu-  
175 lar gyrus, calcarine, and the inferior and the middle occipital lobe showed consistently  
176 elevated PiB-PET signal higher than the mean or regional percentage of other regions  
177 in the subgroups until all regions became saturated (Figure 2B and supplementary fig-  
178 ure 1). Relationships between APOE genotype and early PiB SUVR were considered,  
179 however both APOE genotypes showed similar patterns visually (APOE  $\epsilon$ 4 carriers in  
180 red dot and non-carriers in blue dot in Supplementary Figure 1), implying little effect of  
181 the genotypes on the regional burden of amyloid-beta. The actual median regional SUVR  
182 values for each subgroup are also shown on surface renderings (Supplementary Figure  
183 2).

184

### 185 3.2 Hierarchical clustering

186 To investigate heterogeneity of regional trends of early PiB SUVR deposition,  
187 cluster analysis was used. The hierarchical cluster analysis included the moderate,  
188 moderate-high, and high subgroups of our Early PiB group. Each cluster revealed dis-  
189 tinct spatial patterns of A $\beta$  deposition in the brain (Figure 3A and B): 1) frontal cluster  
190 (red circle) showed higher PiB-PET signal in the frontal lobe and lower in the occipital  
191 lobe, 2) occipitoparietal cluster (green triangles) showed higher PiB-PET signal in both  
192 the parietal and occipital lobes and lower in the frontal lobe, and 3) global cluster (blue

193 square) showed generally lower PiB-PET signal and diffused patterns than the other  
194 two. Pair-wise statistical comparisons of the mean regional SUVR between clusters are  
195 shown in the Supplementary Figure 3 (Student's two-sample t-test). The t-distributed  
196 stochastic neighbor embedding (TSNE) projection results also showed a distinct group-  
197 ing between the clusters (Figure 3C). Particularly, the global PiB SUVR was not signifi-  
198 cantly different between frontal cluster vs. occipitoparietal cluster, however two clusters  
199 showed convincingly different PiB uptake level for frontal and occipitoparietal regions  
200 (lower panels in Figure 3C and Supplementary Figure 3).

201 The clusters had unequal sizes, but were similar in diagnosis, age, and sex (ta-  
202 ble 2). APOE  $\epsilon$ 4 carriers were associated with the frontal and occipitoparietal cluster  
203 groups while non-carriers with the global cluster. In comparison of two types of cluster  
204 analysis, including K-means and hierarchical, both methods provided similar results.  
205 (see Supplementary figure 4). The hierarchical clustering (K=3) was performed using  
206 mean PiB SUVR over brain regions within each subgroup. Starting from low-moderate  
207 and moderate subgroup, a similar pattern of group separations (i.e., frontal,  
208 occipitoparietal and global) showing differences in parietal, frontal lobe and occipital  
209 lobe is observed (Supplementary figure 5).

210

### 211 3.4 Longitudinal changes of PiB-PET signals

212 To investigate the difference of degree of amyloid progression between clusters,  
213 annual PiB SUVR changes of participants with serial data in each cluster subgroups  
214 (n=33, 64, and 186 for the frontal cluster, occipitoparietal cluster and global cluster, re-  
215 spectively) were analyzed (Figure 4). The frontal group showed the highest amyloid-

216 beta accumulation rates vs. other groups across the cortices followed by the  
217 occipitoparietal group.

218 Comparing the frontal and the occipitoparietal groups, the frontal cluster showed  
219 a significantly higher accumulation rate in the frontal lobe and cingulate cortex ( $p < 0.05$ ,  
220 Student's two-sample t-test; Supplementary Figure 6). The Occipital group also showed  
221 a higher progression compared to the global group ( $p < 0.05$ , Student's two-sample t-test;  
222 Supplementary Figure 6). The changes of cognitive test score (MMSE) and the clinical  
223 diagnosis were also considered; however, no significant difference was found among  
224 the cluster types.

225

#### 226 **4. DISCUSSION**

227 This study revealed regional patterns of initial A $\beta$  deposition within the neocortex.  
228 The use of region-specific cutoffs as determined in the young CN group allowed us to  
229 survey distinct areas that showed early A $\beta$  distributions that may otherwise go unseen  
230 using traditional, global meta-ROI analysis. We showed that the earliest observed ele-  
231 vated PiB-PET signals were in the temporal, cingulate, and occipital regions. The per-  
232 centage of those in each subgroup with elevated A $\beta$  in these specific regions also in-  
233 creased sequentially with increasing global SUVR even when it was below typical global  
234 cut off thresholds. Other regions were identified that also showed a sequential elevated  
235 PiB-PET in relatively consistent patterns. We found that early regional A $\beta$  patterns can  
236 be seen in both APOE carriers and non-carriers.

237 The initial areas of A $\beta$  deposition seen included the temporal, cingulate, and oc-  
238 cipital lobes. Namely, fusiform, inferior temporal lobe, middle temporal region, middle

239 temporal pole, superior temporal lobe, posterior cingulum, angular gyrus, calcarine,  
240 cuneus, lingual, inferior occipital lobe, middle occipital lobe, and superior occipital lobe.  
241 Of these, the fusiform, angular gyrus inferior temporal, and the middle temporal region  
242 showed the greatest percentage of participants with elevated PiB levels in early patterns  
243 of deposition. Studies analyzing early deposition patterns of A $\beta$  have found differing re-  
244 sults, leading to large discrepancies of exactly where initial A $\beta$  is accumulating. These  
245 discrepancies include initial aggregation sites found across the frontal lobe,[15-17] pari-  
246 etal,[16, 17] and temporal areas[14]; although others claim temporal areas are the latter  
247 points of aggregation.[15] These data suggest that in the earliest subgroups of A $\beta$  ac-  
248 cumulation, initial rise is seen in the temporal lobe, posterior cingulate region, and the  
249 occipital lobe. Additionally, we also showed that distinct early deposition patterns are  
250 apparent in different subgroups.

251         These findings are supported by theories of the functional connectivity and activi-  
252 ty within the brain.[16] Both high neuronal connectivity and activity have been linked to  
253 the release and deposition of A $\beta$ .[29, 30] The high neuronal connectivity of the posterior  
254 cingulate[31] as well as the occipital lobe[32, 33] appears to make these regions more  
255 vulnerable to A $\beta$  deposition, as seen in our results and others.[30, 34] Our results show-  
256 ing early A $\beta$  load in the middle prefrontal cortex, posterior cingulate, precuneus, and  
257 angular gyrus supports the idea that the default mode network (DMN) may relate with  
258 A $\beta$  deposition.[16] The DMN includes brain regions with high connectivity, particularly in  
259 a spontaneous resting state[35] and has been shown to be vulnerable to A $\beta$   
260 deposition.[32, 36]

261         Late A $\beta$  deposition in the sensorimotor cortex was also observed. A $\beta$  load in this

262 region has shown conflicting results in the past, with some claiming there is deposition  
263 in the sensorimotor cortex.[37] Our results found this region to have slower deposition  
264 rates across subgroups when compared to other regions (Figure 3), but steadily in-  
265 creasing SUVR values across the subgroups (Supplementary Figure 2). A possible ex-  
266 planation could be that the sensorimotor cortex is hyperexcitable,[29] giving higher sus-  
267 ceptibility to A $\beta$  deposition late in the disease, but possibly not at early stages.[34, 38]  
268 However, there is an lack of explanation as to why this area has the lowest A $\beta$  deposi-  
269 tion.[37]

270 We defined several subgroups with distinct patterns of early regional PiB-PET  
271 signal using clustering analysis. These included three distinct patterns of A $\beta$  load in the  
272 brain: high in the frontal lobe and low in the parietal and occipital lobes (frontal cluster),  
273 high in the parietal and occipital lobes and lower in the frontal lobe (occipitoparietal clus-  
274 ter), and low in the temporal, parietal, frontal, and occipital lobes (global cluster). This  
275 observation aligns with a recent study that reported three sub-types of spatial-temporal  
276 amyloid accumulation (i.e., frontal, parietal and occipital).[39] The cingulate and sen-  
277 sorimotor cortices had similar levels of deposition between clusters. The  
278 parahippocampal gyrus, fusiform, inferior and the middle temporal region, and sen-  
279 sorimotor cortices showed higher A $\beta$  load in the occipitoparietal cluster and the anterior  
280 cingulate cortex had higher A $\beta$  deposition in the frontal cluster. Interestingly, the global  
281 cluster group showed similar regional frequencies of amyloid-positivity to other partici-  
282 pants included in the analysis, but the global SUVR was significantly lower compared to  
283 other clusters (Figure 3C and Table 2). There is limited information about the heteroge-  
284 neities in initial A $\beta$  regional deposition; but it has been seen that regional prevalence of

285 cerebral amyloid deposition differs across individuals- even for those already presenting  
286 cognitive impairment.[40] The clinical implications of these heterogeneities are not un-  
287 derstood; however, their appearance in our results suggests early development of dif-  
288 ferent subgroup-related phenotypes and future analysis and correlation with tau deposi-  
289 tion patterns and clinical outcome is needed. Future work will involve further refining  
290 cluster groups when more participants can be evaluated.

291 APOE  $\epsilon$ 4 carriers made up 30.3%, 47.4%, and 20.7% of participants in the  
292 frontal, occipitoparietal and global cluster respectively. In the frontal and occipitoparietal  
293 clusters, where there was a higher percentage of participants who were APOE  $\epsilon$ 4 carri-  
294 ers, the parietal and frontal lobes had relatively higher PiB SUVR. Others have shown  
295 that APOE  $\epsilon$ 4 carriers have heightened levels of A $\beta$  deposition in the frontal parietal re-  
296 gions, validating these patterns.[18] There were fewer APOE  $\epsilon$ 4 carriers in the global  
297 cluster, where deposition was low across multiple areas of the brain again suggesting  
298 that APOE carriers may have specific patterns of A $\beta$  deposition within the brain that dif-  
299 fer from non-carriers.

300 In the longitudinal analysis, the brain regions that showed a higher relative longi-  
301 tudinal A $\beta$  progression includes the frontal, cingulate, temporal, parietal, and occipital  
302 lobes, consistent with the past studies.[11, 15, 17] The comparison between the sub-  
303 groups showed that the frontal cluster had higher A $\beta$  longitudinal deposition than others.  
304 The occipitoparietal group also showed higher rates of accumulation than the global  
305 cluster however, a lower annual percent change was seen in the frontal and cingulate  
306 cortices than the frontal cluster. The result aligns with the fact that being an APOE  $\epsilon$ 4  
307 carrier heightens the risk of A $\beta$  deposition[41] and causes its deposition earlier in life

308 given the high proportion of APOE  $\epsilon$ 4 carriers in the frontal and occipitoparietal clusters.

309 Possible limitations of this study include that confirmation of these early PET find-  
310 ings is difficult. No cognitive abnormalities are generally present. Some studies suggest  
311 that cerebrospinal fluid (CSF) can detect abnormal A $\beta$  before PET but autopsy confir-  
312 mation is needed.[42] Lowered  $\beta$ -amyloid42 in CSF is strongly correlated with the  
313 presentation of early amyloid load in preclinical AD stages[42] and correlated to APOE  
314 carriers.[43] A possible comparison of early PET findings and CSF could be helpful. Ad-  
315 ditionally, our study does not have many AD dementia participants (n=0.6%). Therefore,  
316 we cannot confirm with these data that the patterns we observed are associated with  
317 eventual AD, even though this is a possible outcome for most. This is an area of current  
318 investigations. Despite this limitation, it is important to study A $\beta$  deposition early, within  
319 CU individuals, given that A $\beta$  deposition may begin before dementia occurs by ~20  
320 years.[44]

321 Our findings demonstrate that initial A $\beta$  deposition occurs in specific brain re-  
322 gions and that some subgroups have distinct patterns of deposition that may represent  
323 different clinical phenotypes. In these distinct subgroups, amyloid deposition patterns  
324 are linked to APOE status. Although past studies have inconsistencies in describing  
325 early aggregation areas as described above, this may only be a demonstration of the  
326 presence of different subgroups in each study. We suggest that when larger cohorts are  
327 considered, the earliest patterns of A $\beta$  are seen as a heterogeneous mix of pattern sub-  
328 types that represent different paths of A $\beta$  deposition that may eventually predispose to  
329 distinct AD phenotypes. Identifying these regions of early aggregation and examining  
330 their properties in a population study may best elucidate how A $\beta$  aggregation starts in

331 sporadic AD. This knowledge is crucial in advancing both diagnostic techniques, under-  
332 standing the development of AD phenotypes, and developing disease-modifying drugs.

333

334 **Sources of Funding:** National Institutes of Health grant R01 AG073282 (V.L.), National  
335 Institutes of Health grant P30 AG62677-2 (D.J.), National Institutes of Health grant R01  
336 AG011378 (C.J.), National Institutes of Health grant R01 AG041851 (C.J.), National In-  
337 stitutes of Health grant P50 AG016574 (R.P.), National Institutes of Health grant U01  
338 AG06786 (R.P.), Robert Wood Johnson Foundation, The Elsie and Marvin Dekelboum  
339 Family Foundation, The Edson Family Foundation, The Liston Family Foundation  
340 The Robert H. and Clarice Smith and Abigail van Buren Alzheimer's Disease Research  
341 Program, The GHR Foundation, Foundation Dr. Corinne Schuler (Geneva, Switzerland),  
342 Race Against Dementia, and the Mayo Foundation.

343 **Disclosures:** Authors declare that they have no competing interests.

344

## 345 **Figure legends**

346 **Figure 1. Participant selection criteria and regional PiB signal elevation by**  
347 **sub-grouping.** Participants were selected from the Mayo Clinic Study of Aging  
348 (MCSA). For the Early PiB group, a specific SUVR cut point range created our popu-  
349 lation. The lower cut, 1.29, was determined by the lower tertile of those who are  
350 cognitively unimpaired (CU) and of age 50 and above (50+) in the MCSA. The up-  
351 per cut, 1.64, was determined by the lower tertile of those with global elevated amy-  
352 loid (A+) and 50+ in the MCSA. A total of 1,088 participants fell within this range  
353 and are defined as the Early PiB group for this study. This Early PiB group was then



354 distributed based on the number of total brain regions they had which presented  
355 with increased amyloid. People towards the right of the bar graph have multiple ele-  
356 vated PiB brain regions and those towards the left have fewer elevated brain re-  
357 gions, showing overall severity of PiB deposition. This distributed Early PiB group  
358 was further made into six equitably sized subgroups (very low, low, low-moderate,  
359 moderate, moderate-high, and high) based on the total number of brain regions  
360 presenting elevated PiB. Elevated PiB was determined by a region of interest (ROI)  
361 specific SUVr cut point derived from younger cognitively unimpaired individuals  
362 from the MCSA (30-49 years, n=164; Table 1).

363 **Figure 2. Percent of participants with elevated PiB PET SUVr by region. A.**  
364 Brain regions with elevated PiB for those in the Early PiB group (n=1,088). For each  
365 specific brain region, the percentage of participants within the Early PiB group who  
366 had elevated PiB in respective regions by side is displayed. The brain regions are  
367 sorted high to low and shown as left (red square) and right (blue triangle) and also  
368 by voxel weighted median of the right and left hemisphere (black circle). B. Surface  
369 renderings of the percentage of participants with elevated PiB. Surface renderings  
370 of the percentage of participants with elevated PiB for each brain region is shown  
371 for each subgroup (very low, low, low-moderate, moderate, moderate-high, and  
372 high). Maps of both the left and the right hemispheres are shown for individual sub-  
373 groups.

374 **Figure 3. Hierarchical clustering analysis based on regional SUVr in the three**  
375 **highest subgroups (moderate, moderate-high, high) is shown. A. Regional mean**  
376 **PiB-PET SUVr is shown for each cluster (red circle: frontal cluster, green triangle:**

377 occipitoparietal cluster, and blue square: global cluster). Error bars indicate 95% confi-  
378 dence intervals. (B) 3D-rendering of mean SUVR map of each cluster. C. t-distributed  
379 stochastic neighbor embedding (TSNE) projection is illustrated with different color-  
380 coding (i.e., cluster group, global SUVR, frontal SUVR, and occipitoparietal SUVR).

381 **Figure 4. Annual PiB-PET SUVR change.** Annual PiB-PET SUVR change was  
382 evaluated for individuals within the clusters who had serial data (n = 283). Error  
383 bars indicate 95% confidence intervals.

384 **Table 1.** Subgroup demographics consisting of the Early PiB subgroups and the young-  
385 er cognitively unimpaired group. The ANOVA and Pearson's Chi-squared test indicates  
386 differences in age, education, diagnosis, and the global PiB SUVR value between the  
387 subgroups.

388 **Table 2.** Demographics of the cluster populations from Figure 3. The ANOVA and Pear-  
389 son's Chi-squared test indicates differences in APOE and global PiB SUVR value be-  
390 tween the clusters.

391 **Supplementary Figure 1. The percentage of participants in each subgroup with**  
392 **elevated PiB signal by brain region.** The percentage of participants with elevated PiB  
393 for each brain region is shown (black dot) for each subgroup (very low, low, low-  
394 moderate, moderate, moderate-high, and high). Brain regions are grouped by lobe as  
395 indicated on the y-axis. The mean percentage of the number of regions with elevated  
396 global PiB for each subgroup is represented by a black dashed line and shows an in-  
397 creasing trend across subgroups as 20.26%, 37.66%, 53.11%, 66.31%, 80.06%,

398 93.41% from 'very low' to 'high'. The red dot illustrates APOE carriers and the blue dot  
399 for APOE non-carriers.

400 **Supplementary Figure 2. SUVr map of PiB displayed by brain regions in each sub-**  
401 **group.**

402 **Supplementary Figure 3. Pair-wise comparison of regional SUVr between**  
403 **clusters.** The pair-wise comparisons of mean SUVr (i.e., frontal minus global,  
404 frontal minus occipitoparietal, and occipitoparietal minus global) were performed us-  
405 ing a Student's two-sample t-test. Error bars indicate 95% confidence intervals.

406 **Supplementary Figure 4. The comparison of two different clustering methods.**

407 K-mean clustering and hierarchical clustering, in the three highest subgroups of the  
408 Early PiB group (moderate, moderate-high, high) were compared. The number of  
409 clusters was restricted as 3 (K=3) for both K-mean (cluster 1; n=49, cluster 2; n=65,  
410 cluster 3; n=369) and hierarchical (cluster 1; n=30, cluster 2; n=36, cluster 3;  
411 n=417). Both algorithms showed similar results. Error bars indicate 95% confi-  
412 dence intervals.

413 **Supplementary Figure 5. Regional PiB deposition in each subgroup by hierar-**

414 **chical cluster.** Each column shows the clusters obtained with hierarchical cluster-  
415 ing (K=3) using each subgroup. Clusters were analyzed by mean PiB SUVr over  
416 brain regions. Starting from low-moderate and moderate subgroup, a similar pat-  
417 tern showing differences in cingulate, frontal lobe and occipital lobe is observed.

418 **Supplementary Figure 6. Pair-wise comparison of annual % SUVr change be-**

419 **tween clusters.** The pair-wise comparisons of annual % SUVr change (i.e., frontal

420 minus global, frontal minus occipitoparietal, and occipitoparietal minus global) were  
421 performed using a Student's two-sample t-test.

422 **Supplementary Table 1.** Demographics for overall MCSA 50+ population, popula-  
423 tions to compute selection criteria tertiles (MCSA 50+ CU, MCSA 50+ A+), and  
424 overall Early PiB population.

425 **Supplementary Table 2.** ROI specific SUVR cut points derived from younger cognitively  
426 unimpaired individuals in the MCSA (30-49 years, n=164). Each regional cut point value  
427 is from the 95th percentile per ROI of the younger cognitively unimpaired individuals.  
428 The cut points for the left hemisphere, right hemisphere, and bilateral brain were sepa-  
429 rately calculated for each brain region.

## REFERENCES

- [1] Crews L, Masliah E. Molecular mechanisms of neurodegeneration in Alzheimer's disease. *Human molecular genetics*. 2010;19:R12-R20.
- [2] Terry RD, Masliah E, Salmon DP, Butters N, DeTeresa R, Hill R, et al. Physical basis of cognitive alterations in Alzheimer's disease: synapse loss is the major correlate of cognitive impairment. *Annals of Neurology: Official Journal of the American Neurological Association and the Child Neurology Society*. 1991;30:572-80.
- [3] Klunk WE, Engler H, Nordberg A, Wang Y, Blomqvist G, Holt DP, et al. Imaging brain amyloid in Alzheimer's disease with Pittsburgh Compound-B. *Annals of Neurology: Official Journal of the American Neurological Association and the Child Neurology Society*. 2004;55:306-19.
- [4] Zhang S, Han D, Tan X, Feng J, Guo Y, Ding Y. Diagnostic accuracy of  $^{18}\text{F}$ -FDG and  $^{11}\text{C}$ -PIB-PET for prediction of short-term conversion to Alzheimer's disease in subjects with mild cognitive impairment. *International journal of clinical practice*. 2012;66:185-98.
- [5] Cohen AD, Landau SM, Snitz BE, Klunk WE, Blennow K, Zetterberg H. Fluid and PET biomarkers for amyloid pathology in Alzheimer's disease. *Molecular and cellular neuroscience*. 2019;97:3-17.
- [6] Lowe VJ, Lundt E, Knopman D, Senjem ML, Gunter JL, Schwarz CG, et al. Comparison of  $^{18}\text{F}$  Flutemetamol and  $^{11}\text{C}$  Pittsburgh Compound-B in cognitively normal young, cognitively normal elderly, and Alzheimer's disease dementia individuals. *NeuroImage: Clinical*. 2017;16:295-302.
- [7] Wolk DA, Grachev ID, Buckley C, Kazi H, Grady MS, Trojanowski JQ, et al. Association between in vivo fluorine 18-labeled flutemetamol amyloid positron emission tomography imaging and in vivo cerebral cortical histopathology. *Archives of neurology*. 2011;68:1398-403.
- [8] Byun MS, Yoon Y, Kim G, Yi D, Shin SA, Kim YK, et al. O2-03-06: HETEROGENEITY OF AMYLOID DEPOSITION PATTERN AMONG AMYLOID-POSITIVE COGNITIVELY IMPAIRED INDIVIDUALS. *Alzheimer's & Dementia*. 2019;15:P542-P.
- [9] Engler H, Forsberg A, Almkvist O, Blomqvist G, Larsson E, Savitcheva I, et al. Two-year follow-up of amyloid deposition in patients with Alzheimer's disease. *Brain*. 2006;129:2856-66.
- [10] Grimmer T, Tholen S, Yousefi BH, Alexopoulos P, Förstner A, Förstl H, et al. Progression of cerebral amyloid load is associated with the apolipoprotein E  $\epsilon$ 4 genotype in Alzheimer's disease. *Biological psychiatry*. 2010;68:879-84.
- [11] Villemagne VL, Pike KE, Chételat G, Ellis KA, Mulligan RS, Bourgeat P, et al. Longitudinal assessment of A $\beta$  and cognition in aging and Alzheimer disease. *Annals of neurology*. 2011;69:181-92.
- [12] Thal DR, Rüb U, Orantes M, Braak H. Phases of A $\beta$ -deposition in the human brain and its relevance for the development of AD. *Neurology*. 2002;58:1791-800.
- [13] Bharadwaj PR, Dubey AK, Masters CL, Martins RN, Macreadie IG. A $\beta$  aggregation and possible implications in Alzheimer's disease pathogenesis. *Journal of cellular and molecular medicine*. 2009;13:412-21.
- [14] Cho H, Choi JY, Hwang MS, Kim YJ, Lee HM, Lee HS, et al. In vivo cortical spreading pattern of tau and amyloid in the Alzheimer disease spectrum. *Annals of neurology*. 2016;80:247-58.
- [15] Grothe MJ, Barthel H, Sepulcre J, Dyrba M, Sabri O, Teipel SJ, et al. In vivo staging of regional amyloid deposition. *Neurology*. 2017;89:2031-8.

- [16] Palmqvist S, Schöll M, Strandberg O, Mattsson N, Stomrud E, Zetterberg H, et al. Earliest accumulation of  $\beta$ -amyloid occurs within the default-mode network and concurrently affects brain connectivity. *Nature communications*. 2017;8:1214.
- [17] Mattsson N, Palmqvist S, Stomrud E, Vogel J, Hansson O. Staging  $\beta$ -amyloid pathology with amyloid positron emission tomography. *JAMA neurology*. 2019;76:1319-29.
- [18] Pletnikova O, Kageyama Y, Rudow G, LaClair KD, Albert M, Crain BJ, et al. The spectrum of preclinical Alzheimer's disease pathology and its modulation by ApoE genotype. *Neurobiology of aging*. 2018;71:72-80.
- [19] Jack Jr CR, Wiste HJ, Weigand SD, Therneau TM, Lowe VJ, Knopman DS, et al. Defining imaging biomarker cut points for brain aging and Alzheimer's disease. *Alzheimer's & Dementia*. 2017;13:205-16.
- [20] Lowe VJ, Bruinsma TJ, Min H-K, Lundt ES, Fang P, Senjem ML, et al. Elevated medial temporal lobe and pervasive brain tau-PET signal in normal participants. *Alzheimer's & Dementia: Diagnosis, Assessment & Disease Monitoring*. 2018;10:210-6.
- [21] Roberts RO, Geda YE, Knopman DS, Cha RH, Pankratz VS, Boeve BF, et al. The Mayo Clinic Study of Aging: design and sampling, participation, baseline measures and sample characteristics. *Neuroepidemiology*. 2008;30:58-69.
- [22] Petersen RC. Mild cognitive impairment as a diagnostic entity. *Journal of internal medicine*. 2004;256:183-94.
- [23] Lowe VJ, Lundt ES, Senjem ML, Schwarz CG, Min H-K, Przybelski SA, et al. White matter reference region in PET studies of  $^{11}\text{C}$ -Pittsburgh compound B uptake: effects of age and amyloid- $\beta$  deposition. *Journal of Nuclear Medicine*. 2018;59:1583-9.
- [24] Tzourio-Mazoyer N, Landeau B, Papathanassiou D, Crivello F, Etard O, Delcroix N, et al. Automated anatomical labeling of activations in SPM using a macroscopic anatomical parcellation of the MNI MRI single-subject brain. *Neuroimage*. 2002;15:273-89.
- [25] Lowe VJ, Wiste HJ, Senjem ML, Weigand SD, Therneau TM, Boeve BF, et al. Widespread brain tau and its association with ageing, Braak stage and Alzheimer's dementia. *Brain*. 2018;141:271-87.
- [26] Meltzer CC, Leal JP, Mayberg HS, Wagner Jr HN, Frost JJ. Correction of PET data for partial volume effects in human cerebral cortex by MR imaging. *Journal of computer assisted tomography*. 1990;14:561-70.
- [27] Everitt BS, Landau S, Leese M, Stahl D. An introduction to classification and clustering. *Cluster analysis*. 2011;5:1-13.
- [28] Lloyd S. Least squares quantization in PCM. *IEEE transactions on information theory*. 1982;28:129-37.
- [29] Ferreri F, Vecchio F, Vollero L, Guerra A, Petrichella S, Ponzo D, et al. Sensorimotor cortex excitability and connectivity in Alzheimer's disease: A TMS-EEG co-registration study. *Human brain mapping*. 2016;37:2083-96.
- [30] Li X, Uemura K, Hashimoto T, Nasser-Ghodsi N, Arimon M, Lill CM, et al. Neuronal activity and secreted amyloid  $\beta$  lead to altered amyloid  $\beta$  precursor protein and presenilin 1 interactions. *Neurobiology of disease*. 2013;50:127-34.
- [31] Buckner RL, Sepulcre J, Talukdar T, Krienen FM, Liu H, Hedden T, et al. Cortical hubs revealed by intrinsic functional connectivity: mapping, assessment of stability, and relation to Alzheimer's disease. *Journal of neuroscience*. 2009;29:1860-73.

- [32] Hafkemeijer A, van der Grond J, Rombouts SA. Imaging the default mode network in aging and dementia. *Biochimica et Biophysica Acta (BBA)-Molecular Basis of Disease*. 2012;1822:431-41.
- [33] Zhang H-Y, Wang S-J, Liu B, Ma Z-L, Yang M, Zhang Z-J, et al. Resting brain connectivity: changes during the progress of Alzheimer disease. *Radiology*. 2010;256:598-606.
- [34] Cirrito JR, Kang J-E, Lee J, Stewart FR, Verges DK, Silverio LM, et al. Endocytosis is required for synaptic activity-dependent release of amyloid- $\beta$  in vivo. *Neuron*. 2008;58:42-51.
- [35] Mohan A, Roberto AJ, Mohan A, Lorenzo A, Jones K, Carney MJ, et al. Focus: the aging brain: the significance of the default mode network (DMN) in neurological and neuropsychiatric disorders: a review. *The Yale journal of biology and medicine*. 2016;89:49.
- [36] Bero AW, Yan P, Roh JH, Cirrito JR, Stewart FR, Raichle ME, et al. Neuronal activity regulates the regional vulnerability to amyloid- $\beta$  deposition. *Nature neuroscience*. 2011;14:750-6.
- [37] Fantoni E, Collij L, Alves IL, Buckley C, Farrar G. The spatial-temporal ordering of amyloid pathology and opportunities for PET imaging. *Journal of Nuclear Medicine*. 2020;61:166-71.
- [38] Bero AW, Bauer AQ, Stewart FR, White BR, Cirrito JR, Raichle ME, et al. Bidirectional relationship between functional connectivity and amyloid- $\beta$  deposition in mouse brain. *Journal of neuroscience*. 2012;32:4334-40.
- [39] Collij LE, Salvadó G, Wotschel V, Mastenbroek SE, Schoenmakers P, Heeman F, et al. Spatial-temporal patterns of  $\beta$ -amyloid accumulation: a subtype and stage inference model analysis. *Neurology*. 2022;98:e1692-e703.
- [40] Byun MS, Kim SE, Park J, Yi D, Choe YM, Sohn BK, et al. Heterogeneity of regional brain atrophy patterns associated with distinct progression rates in Alzheimer's disease. *PLoS One*. 2015;10:e0142756.
- [41] Rodrigue KM, Kennedy KM, Park DC. Beta-amyloid deposition and the aging brain. *Neuropsychology review*. 2009;19:436-50.
- [42] Palmqvist S, Mattsson N, Hansson O, Initiative AsDN. Cerebrospinal fluid analysis detects cerebral amyloid- $\beta$  accumulation earlier than positron emission tomography. *Brain*. 2016;139:1226-36.
- [43] Mattsson N, Insel PS, Donohue M, Landau S, Jagust WJ, Shaw LM, et al. Independent information from cerebrospinal fluid amyloid- $\beta$  and florbetapir imaging in Alzheimer's disease. *Brain*. 2015;138:772-83.
- [44] Bateman RJ, Xiong C, Benzinger TL, Fagan AM, Goate A, Fox NC, et al. Clinical and biomarker changes in dominantly inherited Alzheimer's disease. *N Engl J Med*. 2012;367:795-804.

MCSA, age 50+ (n=2,255)

Lower global cutoff: **1.29 SUVr**  
[CU lower tertile]

Higher global cutoff: **1.64 SUVr**  
[A+ lower tertile]

Early PiB Group (n=1,088)

Determine Elevated ROI  
[95<sup>th</sup> percentile of CU, age 30-49]

Severity based on total number of elevated ROI per participant

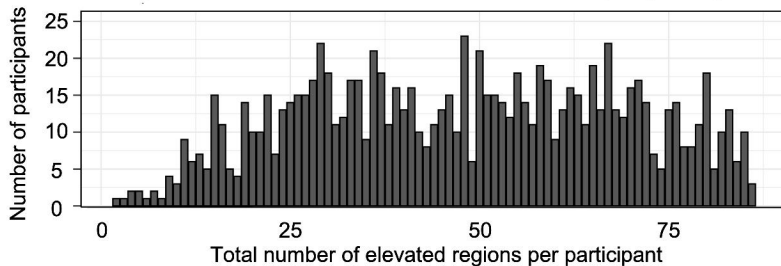

Six Subgroups Based on Severity  
[Very Low, Low, Low-Moderate, Moderate, Moderate-High, High]



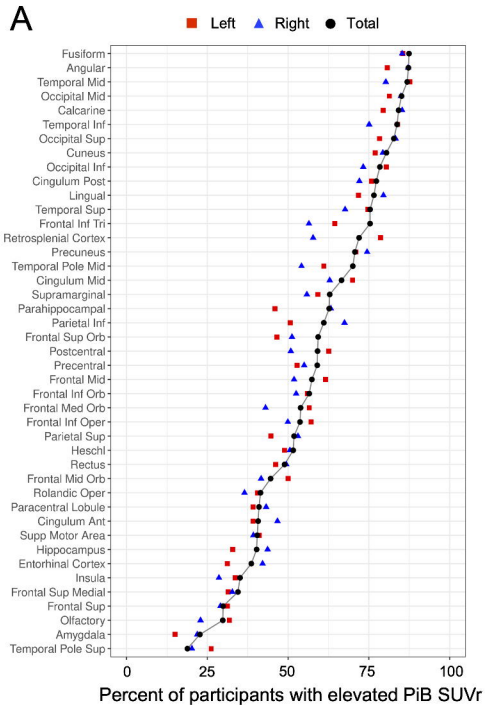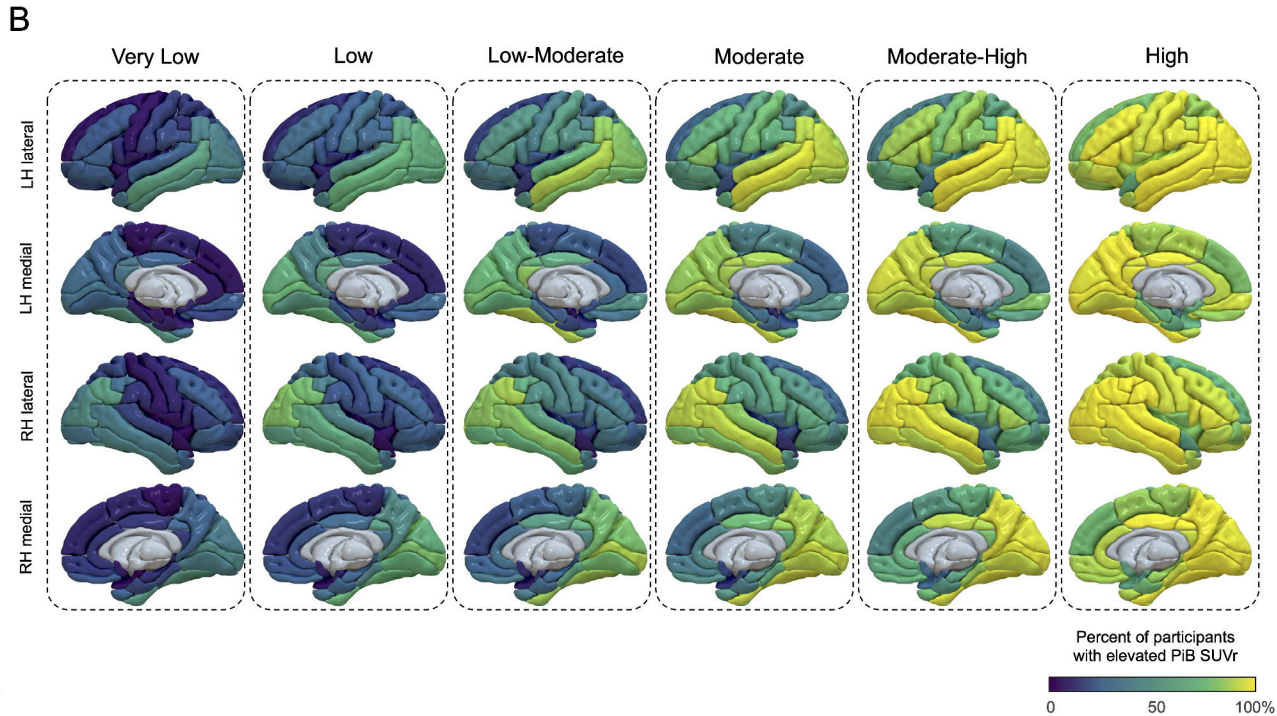

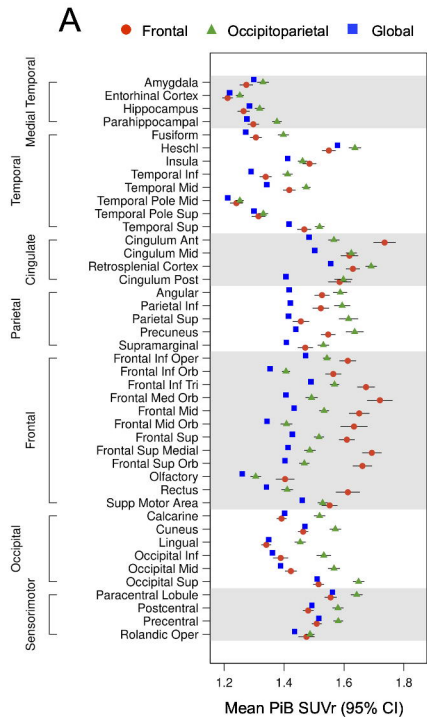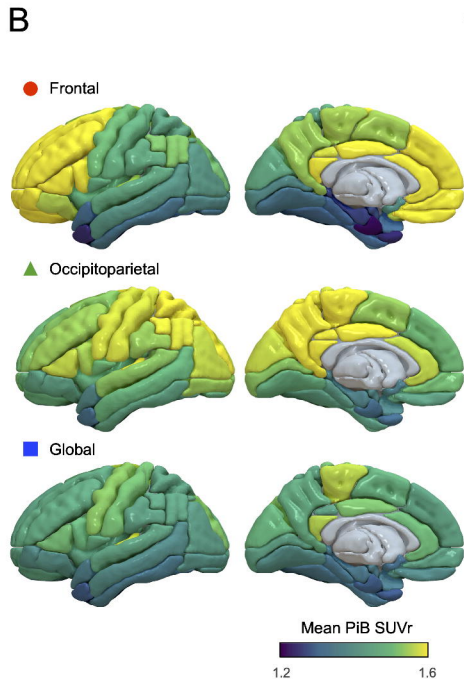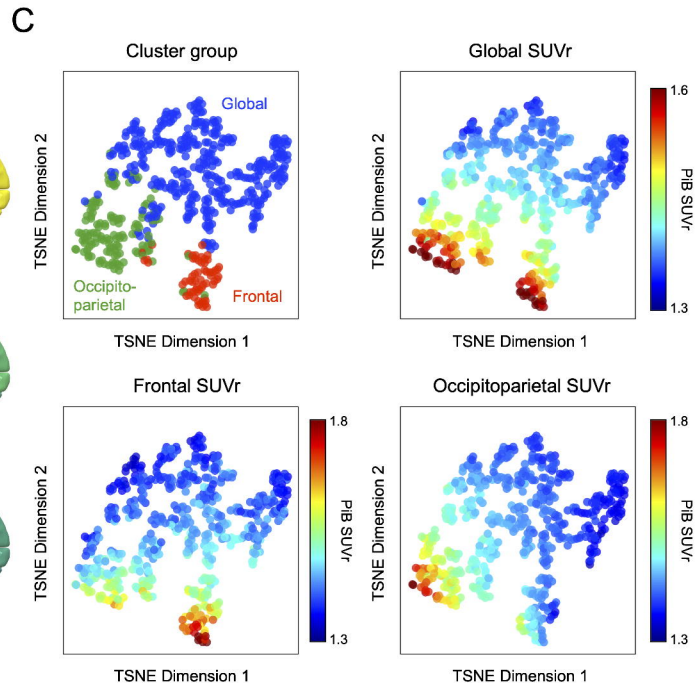

● Frontal ▲ Occipitoparietal ■ Global

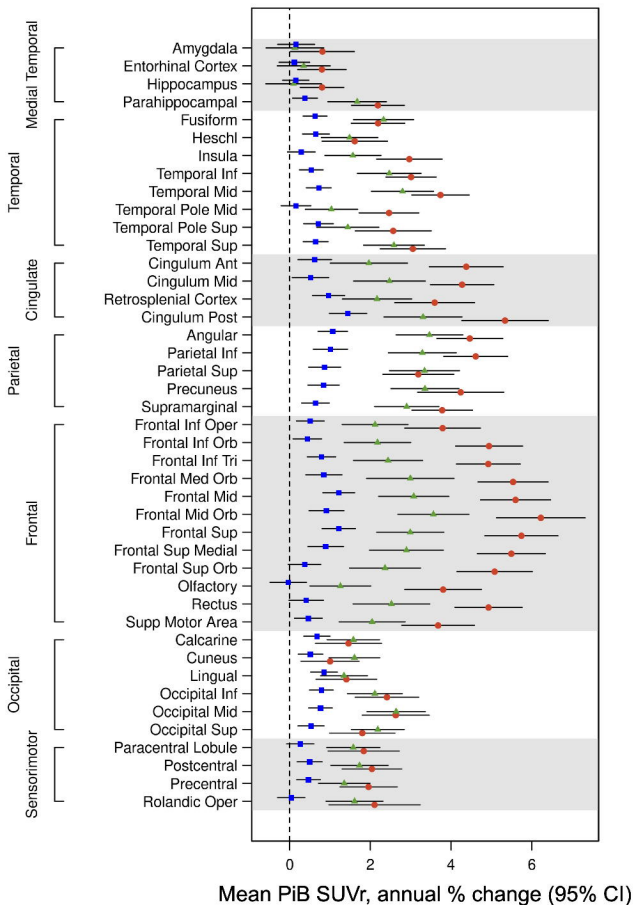

● PiB SUVr total percent elevated ● APOE positive percent elevated ● APOE negative percent elevated

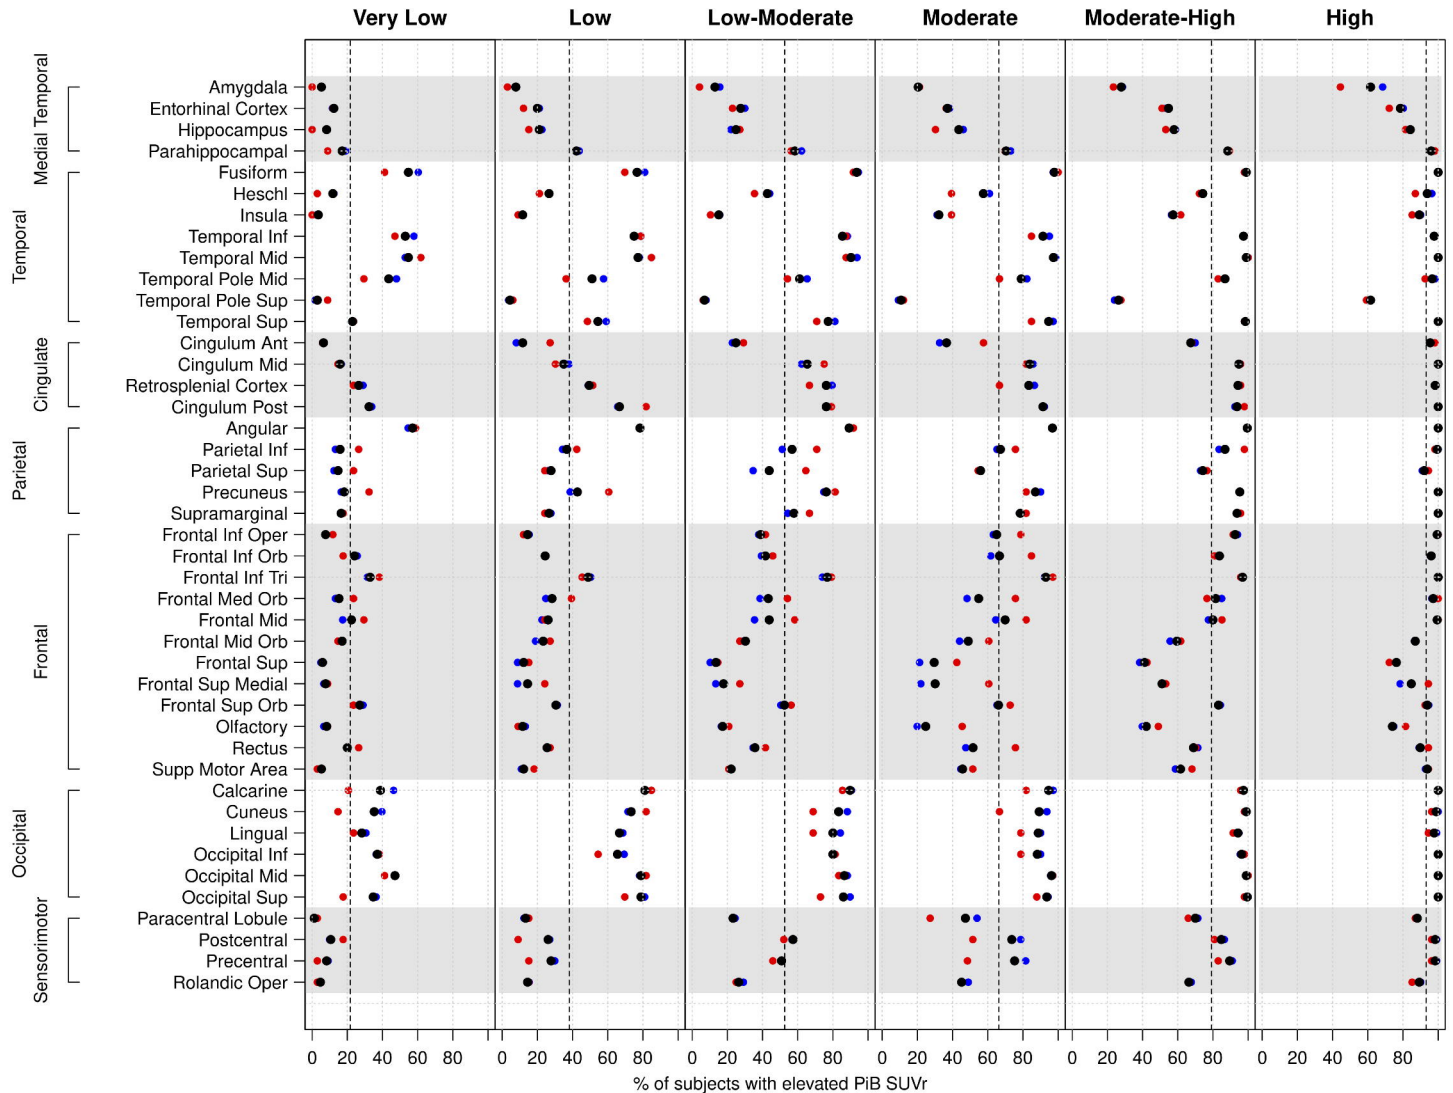

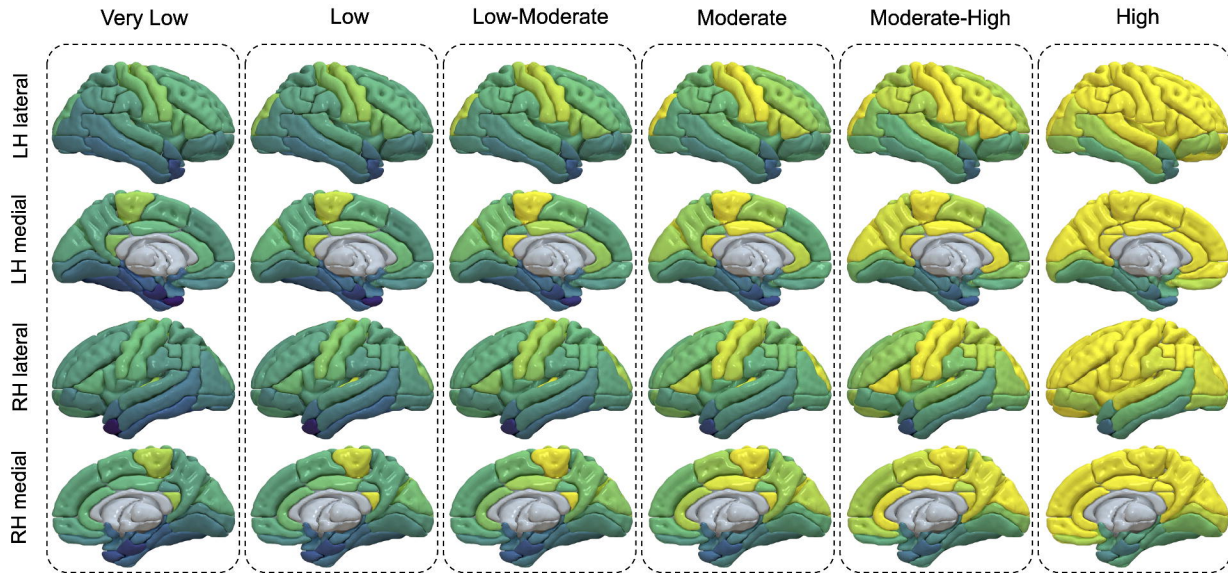



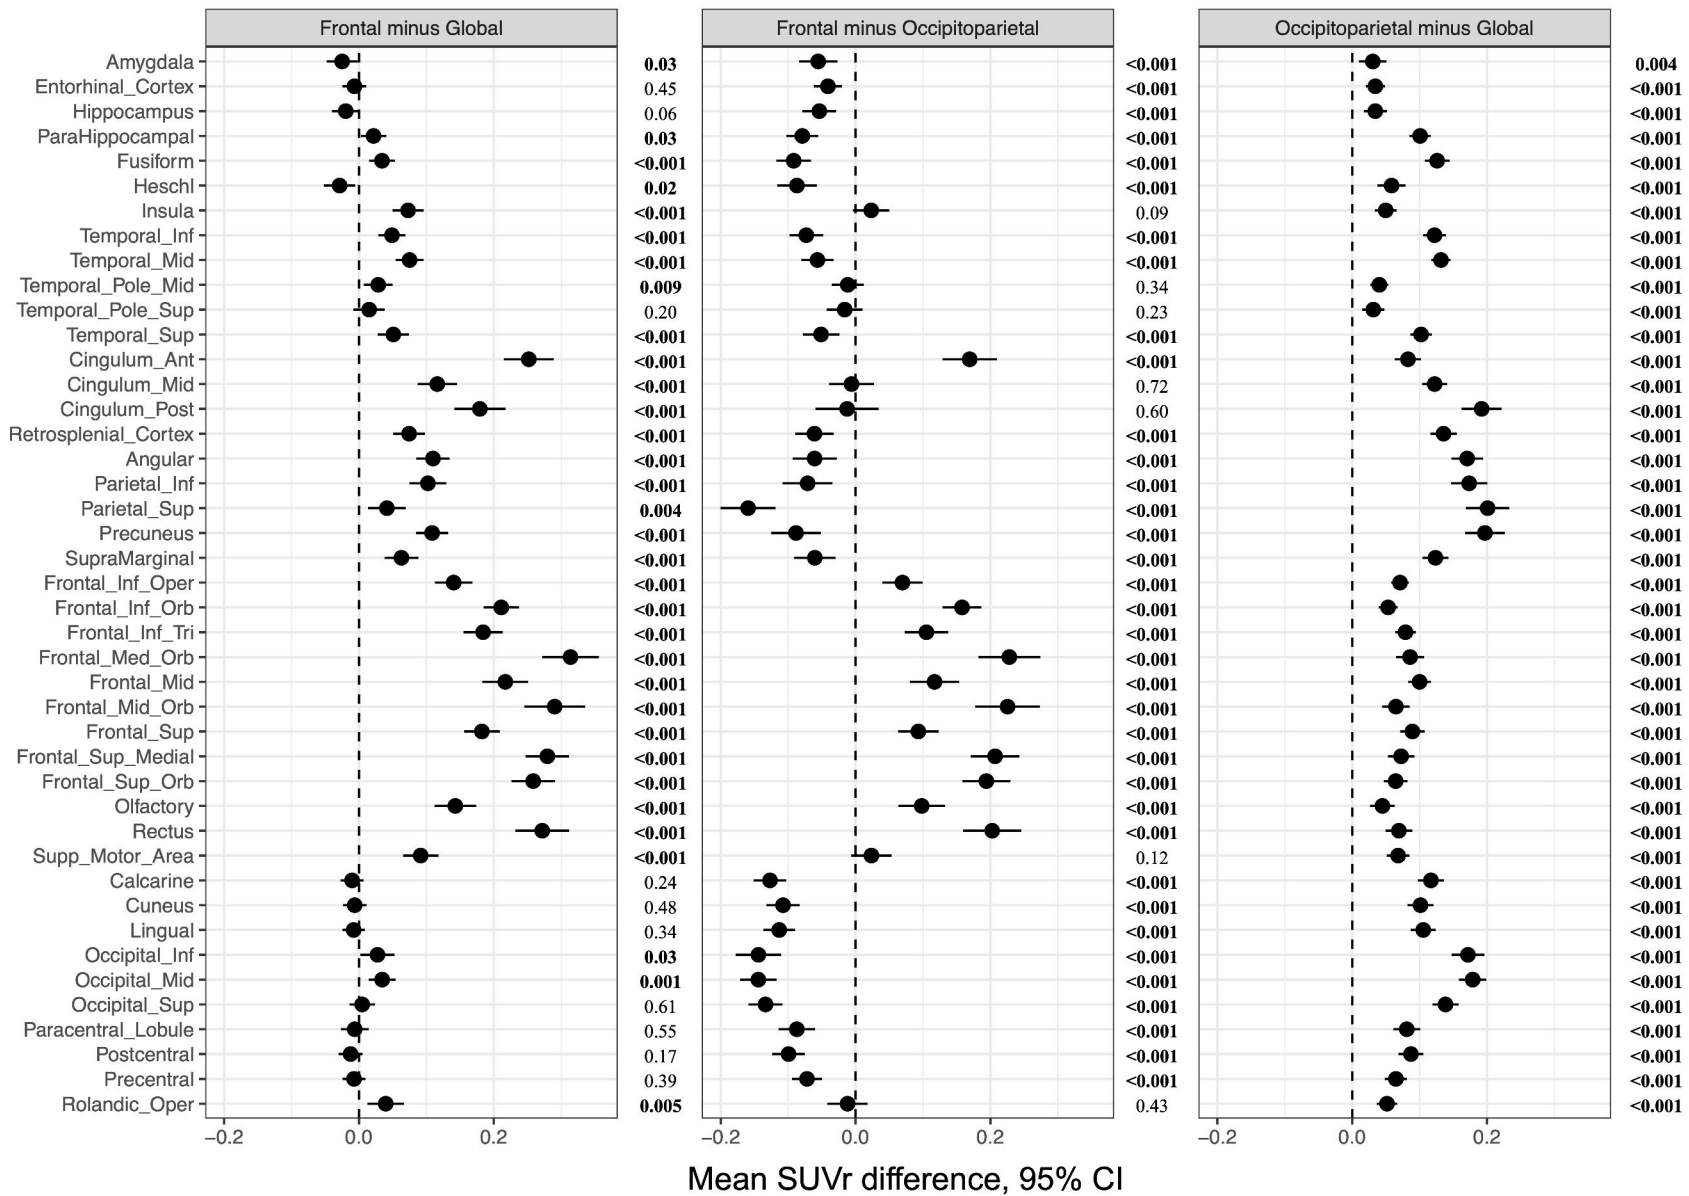

● Frontal ▲ Occipitoparietal ■ Global

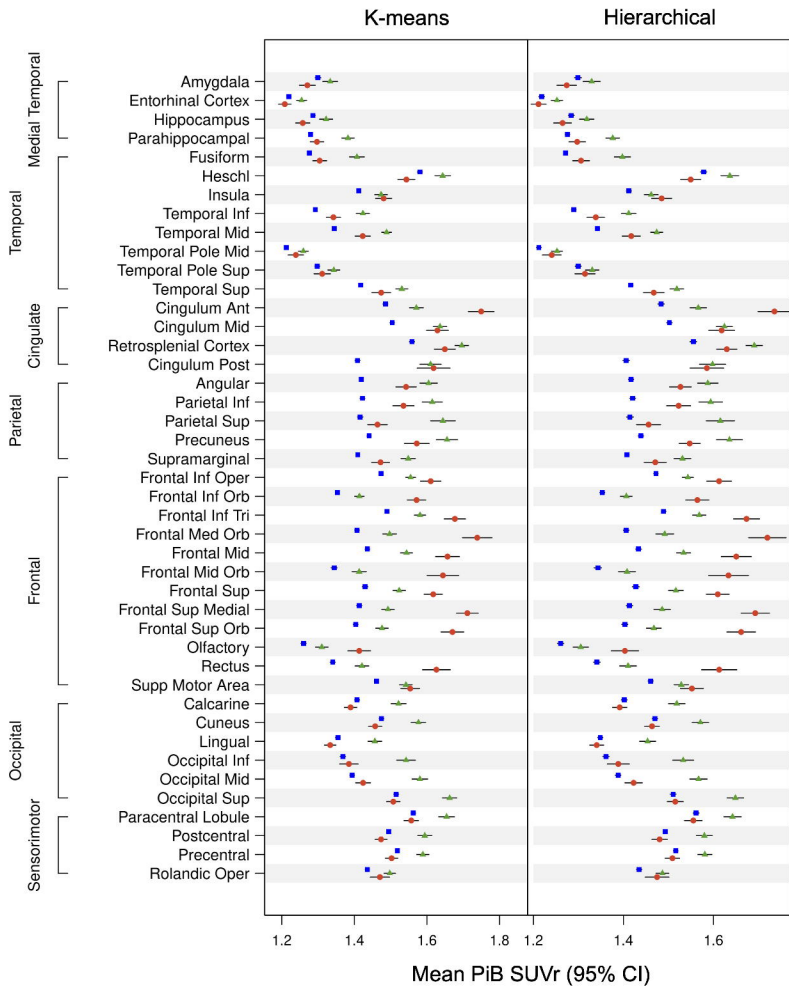

● Frontal ● Occipitoparietal ● Global

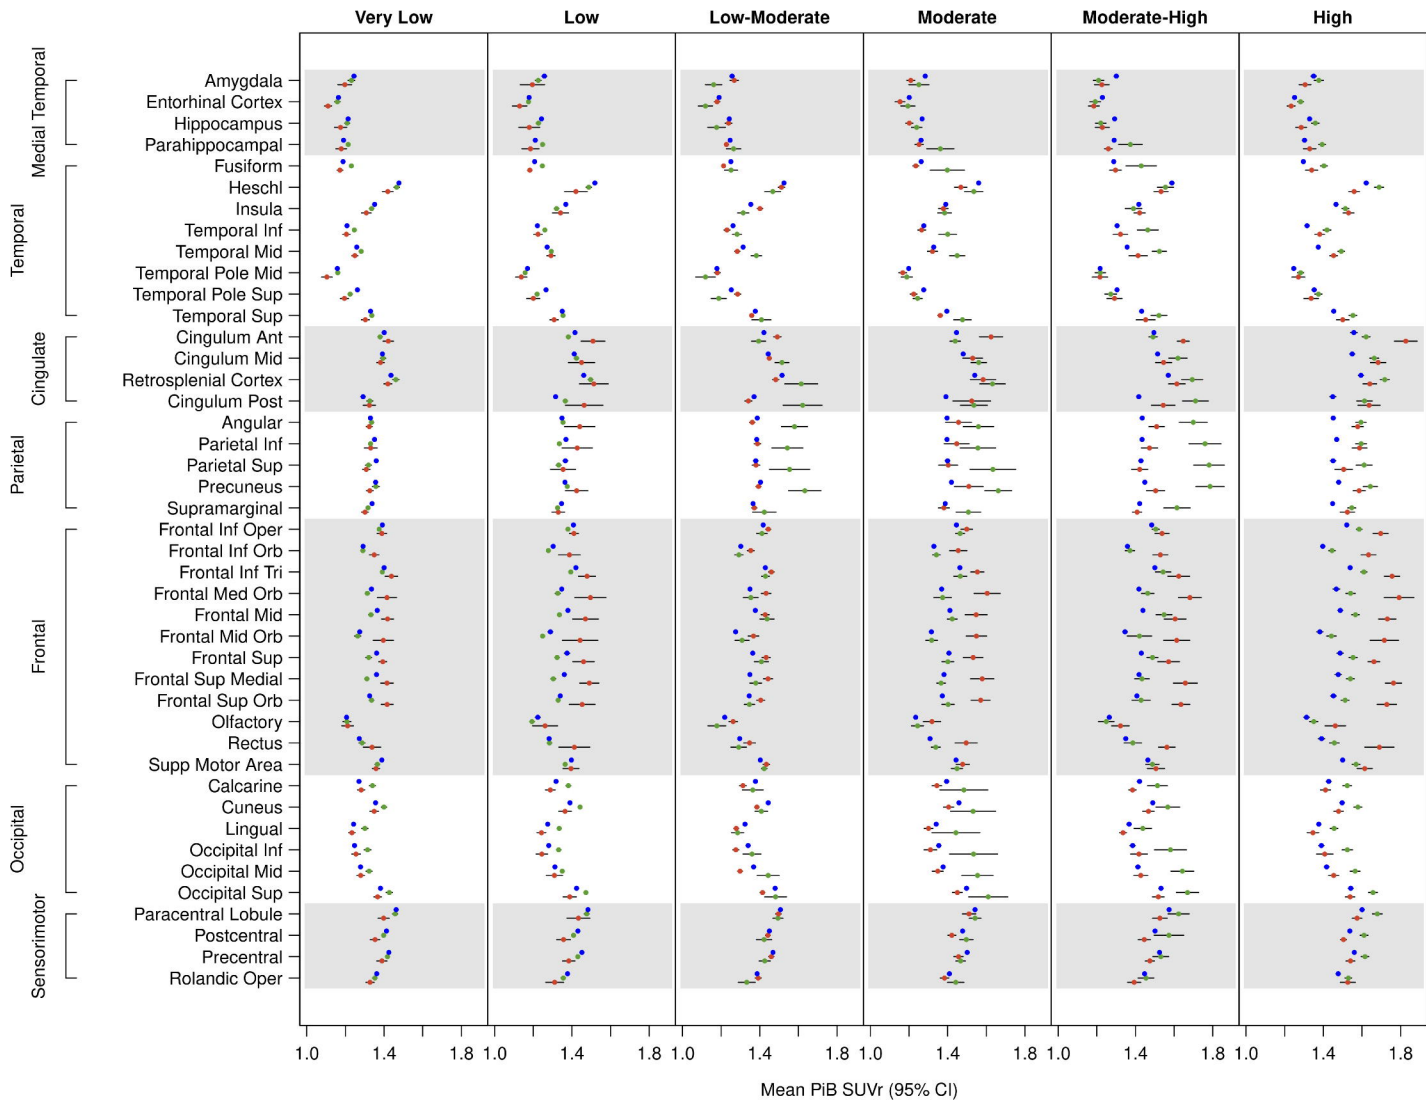



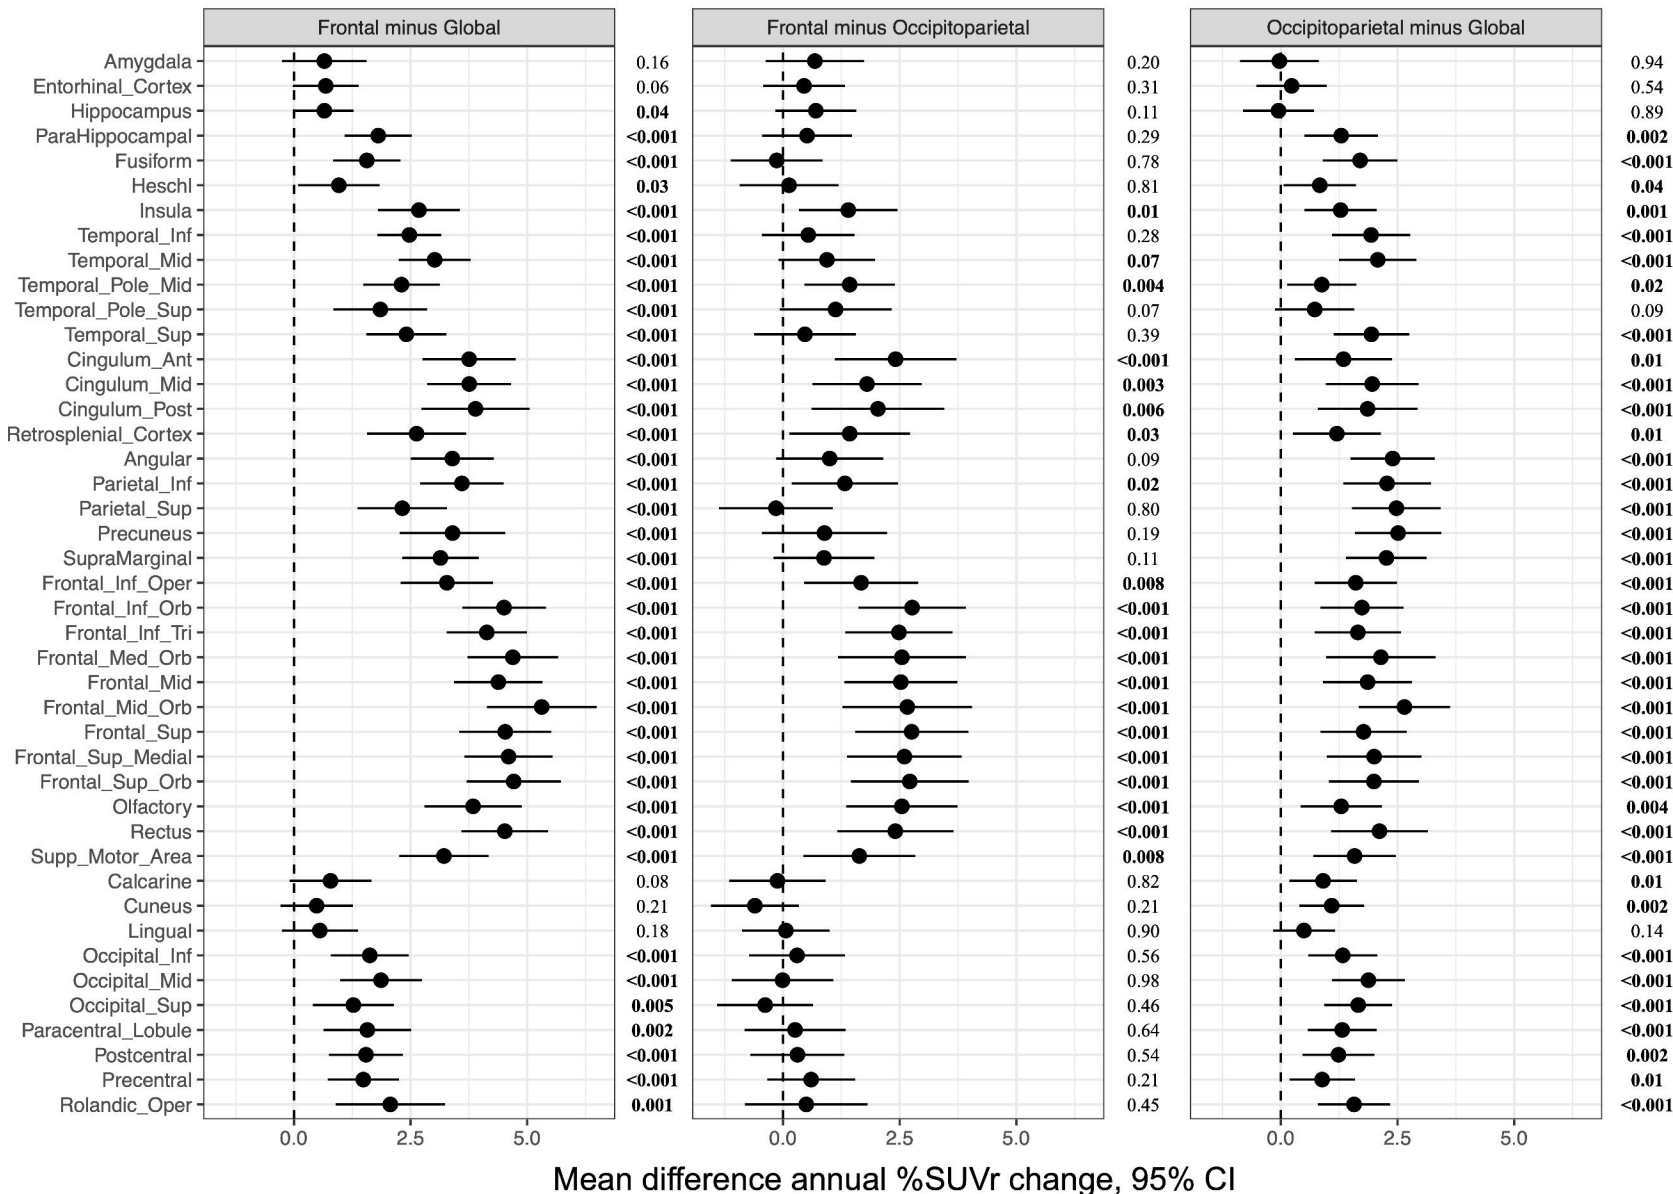

Source: https://medrxiv.org/content/10.1101/2023.05.14.23289948.full.pdf
